# Supplementary material for: Use of traditional medicine and control of hypertension in 12 African countries
Source: PubMed Central journal article supplement — BMJ Glob Health. 2022 Jun 1;7(6):e008138. doi: 10.1136/bmjgh-2021-008138 (PMC9163537; doi:10.1136/bmjgh-2021-008138), 2022-06-01
Supplement: bmjgh-2021-008138supp001.pdf [file bmjgh-2021-008138supp001.pdf]

**Supplemental Figure.** Factors associated with use of traditional medicine: multivariable logistic regression, n=1971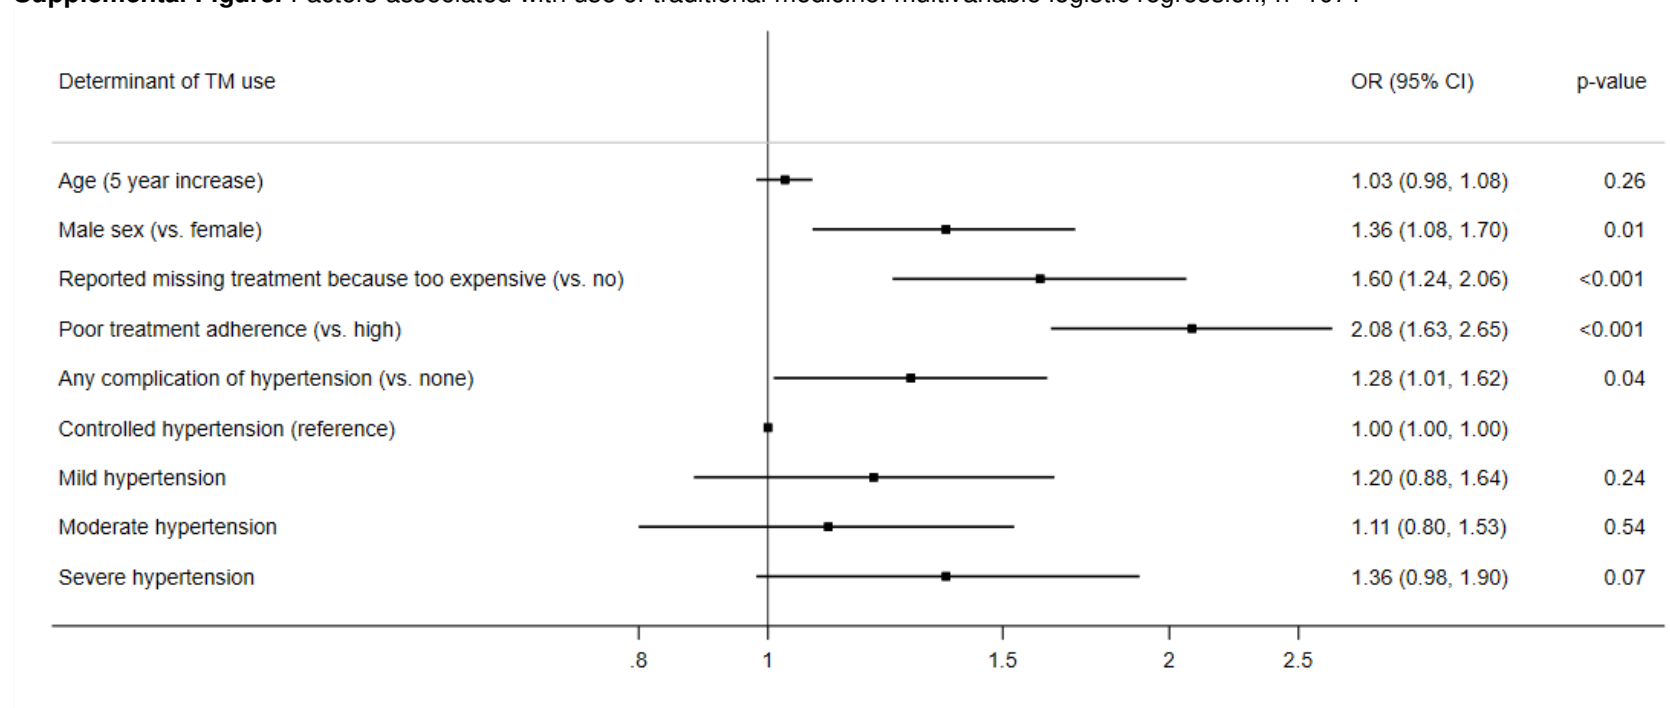

Estimates are mutually adjusted in one single multivariable model with random effect for country.
